# Supplementary material for: Overcoming the Gas–Liquid Mass Transfer of Oxygen by Coupling Photosynthetic Water Oxidation with Biocatalytic Oxyfunctionalization
Source: PubMed Central journal article supplement — Angew Chem Int Ed Engl. 2017 Oct 27;56(47):15146–9. doi: 10.1002/anie.201706886 (PMC5708270; doi:10.1002/anie.201706886), 2017-10-27
Supplement: ANIE-56-15146-s001.pdf [file ANIE-56-15146-s001.pdf]

## **Author Contributions**

A.H. Data curation: Lead; Formal analysis: Lead; Investigation: Equal; Methodology: Equal; Validation: Equal; Writing – original draft: Lead; Writing – review & editing: Equal

B.B. Investigation: Equal; Methodology: Equal; Project administration: Supporting; Supervision: Equal; Validation: Equal; Writing – original draft: Supporting; Writing – review & editing: Equal

A.S. Conceptualization: Lead; Funding acquisition: Lead; Investigation: Equal; Methodology: Equal; Project administration: Lead; Supervision: Equal; Validation: Equal; Writing – original draft: Supporting; Writing – review & editing: Equal.
